# Supplementary material
Source: MDPI journal article supplement (https://www.mdpi.com/2071-1050/13/21/12280)
Supplement: s1 [file s1]

## Supplementary Materials

**Table S1:** Invertebrate list with unique ID, functional group, and crop association (G: grain; W: willow; R: riparian) across all three sampling years (2017-2019).

| ID  | Common Name                    | Scientific Classification (Order: Family: Genus species) | Functional Group                      | Crop Association |
|-----|--------------------------------|----------------------------------------------------------|---------------------------------------|------------------|
| X1  | Japanese beetle                | <i>Coleoptera : Scarabaeidae : Popillia japonica</i>     | Pest                                  | All three        |
| X2  | Hoverfly/flower fly            | <i>Diptera : Syrphidae : Unknown</i>                     | Pollinator + predator                 | All three        |
| X3  | Black fly: combined            | <i>Diptera : Sarcophagidae : Unknown</i>                 | Pollinator + predator + other benefit | All three        |
| X4  | Soldier beetle                 | <i>Coleoptera : Cantharidae : Chauliognathus</i>         | Pollinator + predator                 | All three        |
| X5  | Pennsylvania firefly           | <i>Coleoptera : Lampyridae : Photuris pensylvanica</i>   | Predator                              | All three        |
| X6  | <i>Andrena nasonii</i> bee     | <i>Hymenoptera : Andrenidae : Andrena nasonii</i>        | Pollinator                            | All three        |
| X7  | May beetle                     | <i>Coleoptera : Scarabaeidae : Phyllophaga spp</i>       | Pest                                  | G,W              |
| X8  | Long-legged fly                | <i>Diptera : Dolichopodidae : Unknown</i>                | Predator                              | All three        |
| X9  | Fungus gnat                    | <i>Diptera : Sciariidae : Unknown</i>                    | Other benefit                         | All three        |
| X10 | Forage looper moth             | <i>Lepidoptera : Unknown : Caenurgina erechtera</i>      | Pest + other benefit                  | All three        |
| X11 | Longhorn bee                   | <i>Hymenoptera : Apidae : Melissodes bimaculate</i>      | Pollinator                            | All three        |
| X12 | Ground beetle                  | <i>Coleoptera : Carabidae : Harpalus spp.</i>            | Other benefit                         | All three        |
| X13 | Xenotemna moth                 | <i>Lepidoptera : Tortricidae : Xenotemna spp</i>         | Pest                                  | All three        |
| X14 | Agapostemon sweat bee          | <i>Hymenoptera : Halictidae : Agapostemon spp</i>        | Pollinator + pest                     | All three        |
| X15 | Big dipper firefly             | <i>Coleoptera : Lampyridae : Photinus pyralis</i>        | Predator                              | G,W              |
| X16 | Seedcorn beetle                | <i>Coleoptera : Carabidae : Stenolophus spp</i>          | Predator + pest                       | All three        |
| X17 | Milkweed bug                   | <i>Hemiptera : Lygaeidae : Oncopeltus fasciatus</i>      | Pollinator                            | G                |
| X18 | Sac spider                     | <i>Araneae : Clubionidae : Clubiona spp</i>              | Predator                              | All three        |
| X19 | Common brown leafhopper        | <i>Hemiptera : Aphrophoridae : Unknown</i>               | Pest                                  | All three        |
| X20 | Green damselfly                | <i>Odonata : Coenagrionidae : Unknown</i>                | Predator                              | R                |
| X21 | Colorful leafhopper            | <i>Hemiptera : Cicadellidae : Graphocephala spp</i>      | Pest                                  | R,W              |
| X22 | Ichneumon parasitic wasp       | <i>Hymenoptera : Ichneumonidae : Unknown</i>             | Predator                              | R                |
| X24 | Blue damselfly                 | <i>Odonata : Coenagrionidae : Enallagma cyathigerum</i>  | Predator                              | W                |
| X25 | Crab spider                    | <i>Araneae : Thomisidae : Unknown</i>                    | Predator                              | All three        |
| X26 | Asian multicolored lady beetle | <i>Coleoptera : Coccinellidae : Harmonia axyridis</i>    | Pest                                  | W                |
| X27 | Black damselfly: female        | <i>Odonata : Coenagrionidae : Unknown</i>                | Predator                              | All three        |
| X28 | Yellow fly                     | <i>Diptera : Tephritidae : Unknown</i>                   | Pest                                  | R,G              |
| X29 | Carpenter ant                  | <i>Hymenoptera : Formicidae : Camponotus spp</i>         | Pest + other benefit                  | R,W              |
| X30 | Deer fly                       | <i>Diptera : Tabanidae : Chrysops callidus</i>           | Pollinator + predator + pest          | R,G              |

|     |                                       |                                                            |                                              |           |
|-----|---------------------------------------|------------------------------------------------------------|----------------------------------------------|-----------|
| X31 | Great black wasp                      | <i>Hymenoptera : Sphecidae : Sphex pensylvanicus</i>       | Pollinator + predator                        | All three |
| X32 | Flower longhorn beetle                | <i>Coleoptera : Cerambycidae : Strangalia famelica</i>     | Pollinator + other benefit                   | R         |
| X33 | Cellar spiders                        | <i>Araneae : Pholcidae : Unknown</i>                       | Predator                                     | W         |
| X34 | Crane fly                             | <i>Diptera : Tipulidae : Unknown</i>                       | Other benefit                                | All three |
| X35 | Black horse fly                       | <i>Diptera : Tabanidae : Tabanus atratus</i>               | Pollinator + pest                            | R         |
| X36 | Honeybee                              | <i>Hymenoptera : Apidae : Apis spp</i>                     | Pollinator                                   | G,W       |
| X37 | Brown stink bug                       | <i>Hemiptera : Pentatomidae : Halyomorpha halys</i>        | Pest                                         | All three |
| X38 | Painted lady butterfly                | <i>Lepidoptera : Nymphalidae : Vanessa cardui</i>          | Pollinator                                   | All three |
| X39 | Augochlora sweat bee                  | <i>Hymenoptera : Halictidae : Augochlora spp</i>           | Pollinator                                   | All three |
| X40 | Spider wasp: <i>Auplopus mellipes</i> | <i>Hymenoptera : Pompilidae : Auplopus spp</i>             | Pollinator + predator                        | All three |
| X41 | Carpenter bee                         | <i>Hymenoptera : Apidae : Ceratina calcarata</i>           | Pollinator                                   | All three |
| X42 | Click beetle species                  | <i>Coleoptera : Elateridae : Unknown</i>                   | Pollinator + predator + pest                 | All three |
| X43 | Willow leaf beetle                    | <i>Coleoptera : Chrysomelidae : Plagioder</i>              | Pollinator + pest                            | All three |
| X44 | Tangle-web spider                     | <i>Araneae : Theridiidae : Unknown</i>                     | Predator                                     | R,W       |
| X45 | Bark-gnawing beetle                   | <i>Coleoptera : Trogossitidae : Peltis septentrionalis</i> | Other benefit                                | R         |
| X46 | Leafhopper                            | <i>Hemiptera : Cicadellidae : Unknown</i>                  | Pest                                         | All three |
| X47 | Drosophilinae                         | <i>Diptera : Drosophilidae : Unknown</i>                   | Pollinator                                   | All three |
| X48 | Aphid                                 | <i>Hemiptera : Aphidoidea : Unknown</i>                    | Pest                                         | All three |
| X49 | Blow fly: greenbottle, bluebottle     | <i>Diptera : Calliphoridae : Unknown</i>                   | Pollinator + other benefit                   | All three |
| X50 | Mosquito                              | <i>Diptera : Culicidae : Unknown</i>                       | Pest                                         | All three |
| X51 | Tumbling flower beetle                | <i>Coleoptera : Mordellidae : Unknown</i>                  | Pollinator + predator + pest + other benefit | R,G       |
| X52 | Tumbling flower beetle                | <i>Coleoptera : Mordellidae : Unknown</i>                  | Pollinator + predator + pest + other benefit | All three |
| X53 | Tick                                  | <i>Ixodida : Ixodoidea : Unknown</i>                       | Pest                                         | G,W       |
| X54 | Spider wasp                           | <i>Hymenoptera : Pompilidae : Unknown</i>                  | Predator + pest                              | G,W       |
| X56 | Clouded skipper                       | <i>Lepidoptera : Hesperidae : Lerema accius</i>            | Pollinator                                   | G         |
| X57 | Sap beetle: Conotelus spp.            | <i>Coleoptera : Nitidulidae : Conotelus spp</i>            | Pollinator                                   | All three |
| X58 | Hoverfly                              | <i>Diptera : Syrphidae : Epistrophella spp</i>             | Pollinator                                   | All three |
| X59 | Sap beetle                            | <i>Coleoptera : Nitidulidae : Epuraea spp</i>              | Pollinator + pest + other benefit            | All three |
| X61 | Braconid wasp                         | <i>Hymenoptera : Braconidae : Unknown</i>                  | Predator                                     | All three |
| X63 | Noctuid caterpillar                   | <i>Lepidoptera : Noctuidae : Unknown</i>                   | Pest                                         | G,W       |
| X65 | Marsh fly                             | <i>Diptera : Sciomyzidae : Unknown</i>                     | Pollinator + predator                        | All three |
| X66 | Scoliid wasp                          | <i>Hymenoptera : Scoliidae : Unknown</i>                   | Predator                                     | G,W       |
| X67 | Weevil wasp                           | <i>Hymenoptera : Crabronidae : Cerceris spp.</i>           | Predator                                     | R         |
| X68 | Jagged ambush bug                     | <i>Hemiptera : Reduviidae : Phymata spp.</i>               | Predator                                     | R         |
| X69 | Sulfur butterfly                      | <i>Lepidoptera : Pieridae : Colias</i>                     | Pollinator                                   | R,G       |
| X70 | Bean leaf beetle                      | <i>Coleoptera : Chrysomelidae : Cerotoma trifurcata</i>    | Pest                                         | All three |

|      |                               |                                                                      |                          |           |
|------|-------------------------------|----------------------------------------------------------------------|--------------------------|-----------|
| X71  | White caterpillar             | <i>Lepidoptera : Noctuidae : Unknown</i>                             | Pest                     | G         |
| X72  | Ghost spider:<br>Anyphaenidae | <i>Araneae : Anyphaenidae : Unknown</i>                              | Predator                 | All three |
| X73  | Predatory stink bug           | <i>Hemiptera : Pentatomidae : Unknown</i>                            | Predator                 | All three |
| X74  | American snout<br>butterfly   | <i>Lepidoptera : Nymphalidae : Libytheana<br/>carinenta</i>          | Pollinator               | R         |
| X75  | Green stink bug               | <i>Hemiptera : Pentatomidae : Chinavia<br/>hilaris</i>               | Pest                     | G         |
| X76  | Burrowing bug                 | <i>Coleoptera : Cydnidae : Unknown</i>                               | Pest                     | G         |
| X77  | Katydid                       | <i>Orthoptera : Tettigoniidae : Unknown</i>                          | Pest                     | G,W       |
| X78  | Skipper butterfly             | <i>Lepidoptera : Hesperiiidae : Unknown</i>                          | Pollinator               | All three |
| X79  | Pirate bug                    | <i>Hemiptera : Anthocoridae : Orius<br/>insidiosus</i>               | Predator                 | All three |
| X80  | Tan jumping spider            | <i>Araneae : Salticidae : Unknown</i>                                | Predator                 | W         |
| X81  | Silver-spotted skipper        | <i>Lepidoptera : Hesperiiidae : Epargyreus<br/>clarus</i>            | Pollinator               | G,W       |
| X82  | Plant bug                     | <i>Heteroptera : Miridae : Unknown</i>                               | Pest                     | G         |
| X83  | Seed bug                      | <i>Heteroptera : Rhyparochromidae :<br/>Unknown</i>                  | Pest                     | G         |
| X84  | Robber fly                    | <i>Diptera : Asilidae : Unknown</i>                                  | Predator + other benefit | G,W       |
| X85  | Signal fly                    | <i>Diptera : Platystomatidae : Rivellia spp</i>                      | Pest + other benefit     | G,W       |
| X86  | Flat bark beetle              | <i>Coleoptera : Silvanidae : Telephanus<br/>atricapillus</i>         | Other benefit            | All three |
| X87  | Lacewing fly                  | <i>Neuroptera : Unknown : Unknown</i>                                | Predator                 | All three |
| X88  | Noctuid caterpillar           | <i>Lepidoptera : Noctuidae : Unknown</i>                             | Pest                     | G         |
| X89  | Bee                           | <i>Hymenoptera : Unknown : Unknown</i>                               | Unknown                  | R,G       |
| X90  | Sap beetle                    | <i>Coleoptera : Unknown : Unknown</i>                                | Unknown                  | All three |
| X91  | Cocklebur weevil              | <i>Coleoptera : Curculionidae : Rhodobaenus<br/>quinquepunctatus</i> | Pest                     | G         |
| X92  | Pigweed flea beetle           | <i>Coleoptera : Chrysomelidae : Disonycha<br/>glabrata</i>           | Other benefit            | R,G       |
| X93  | Milkweed leaf beetle          | <i>Coleoptera : Chrysomelidae : Labidomera<br/>clivicollis</i>       | Other benefit            | R,G       |
| X94  | Sap beetle                    | <i>Coleoptera : Kateretidae : Unknown</i>                            | Pollinator + pest        | All three |
| X95  | Pearl crescent                | <i>Lepidoptera : Nymphalidae : Phyciodes<br/>tharos</i>              | Pollinator               | W         |
| X96  | Fruit fly                     | <i>Diptera : Tephritidae : Eureka aequalis</i>                       | Other benefit            | G,W       |
| X97  | White moth                    | <i>Lepidoptera : Unknown : Unknown</i>                               | Pest + other benefit     | All three |
| X98  | Longhorn bee                  | <i>Hymenoptera : Apidae : Melissodes spp</i>                         | Pollinator               | All three |
| X99  | Brown moth                    | <i>Lepidoptera : Unknown : Unknown</i>                               | Pest + other benefit     | R,G       |
| X100 | American bird<br>grasshopper  | <i>Orthoptera : Acrididae : Schistocerca<br/>americana</i>           | Pest                     | G         |
| X101 | Spur-throated<br>grasshopper  | <i>Orthoptera : Acrididae : Melanoplus spp</i>                       | Pest                     | G         |
| X102 | Long-legged fly               | <i>Diptera : Dolichopodidae : Dolichopodidae<br/>spp</i>             | Predator + pest          | All three |
| X103 | Jumping spider                | <i>Araneae : Salticidae : Unknown</i>                                | Predator                 | G         |
| X104 | Spider wasp                   | <i>Hymenoptera : Pompilidae : Unknown</i>                            | Predator                 | All three |
| X105 | Harvestman                    | <i>Opiliones : Unknown : Unknown</i>                                 | Predator                 | W         |

|      |                                  |                                                           |                           |           |
|------|----------------------------------|-----------------------------------------------------------|---------------------------|-----------|
| X107 | Pink spotted: Juvenile ladybug   | <i>Coleoptera : Coccinellidae : Coleomegilla maculata</i> | Predator                  | G         |
| X108 | Long-legged fly                  | <i>Diptera : Unknown : Unknown</i>                        | Unknown                   | G,W       |
| X109 | Crane fly                        | <i>Diptera : Unknown : Unknown</i>                        | Unknown                   | G,W       |
| X111 | Green lacewing fly larva         | <i>Neuroptera : Chrysopidae : Unknown</i>                 | Predator                  | W         |
| X112 | Flying ant                       | <i>Hymenoptera : Formicidae : Unknown</i>                 | Predator                  | All three |
| X115 | Bird nest barklice               | <i>Psocoptera : Psoquilidae : Unknown</i>                 | Other benefit             | All three |
| X116 | Phoridae fly                     | <i>Diptera : Phoridae : Unknown</i>                       | Unknown                   | All three |
| X117 | Brown beetle                     | <i>Coleoptera : Unknown : Unknown</i>                     | Unknown                   | All three |
| X118 | Ant-like flower beetle           | <i>Coleoptera : Anthicidae : Notoxus spp</i>              | Pollinator + predator     | All three |
| X119 | Lace bug                         | <i>Hemiptera : Tingidae : Unknown</i>                     | Pest                      | All three |
| X120 | Fungus gnat                      | <i>Diptera : Diadocidiidae : Unknown</i>                  | Other benefit             | All three |
| X121 | <i>Thrips palmi</i>              | <i>Thysanoptera : Thripidae : Thrips palmi</i>            | Pest                      | All three |
| X122 | Black weevil                     | <i>Coleoptera : Curculionoidea : Unknown</i>              | Pest                      | G,W       |
| X123 | Darkling beetle                  | <i>Coleoptera : Tenebrionidae : Unknown</i>               | Pest                      | R,G       |
| X124 | Gnat bug                         | <i>Heteroptera : Enicocephalidae : Unknown</i>            | Pest                      | G,W       |
| X125 | Plant parasitic hemipteran       | <i>Hemiptera : Calophyidae : Unknown</i>                  | Pest                      | All three |
| X126 | Sap beetle                       | <i>Coleoptera : Nitidulidae : Epuraea spp</i>             | Pest                      | R,G       |
| X127 | Woodlouse spider                 | <i>Araneae : Dysderidae : Dysdera crocata</i>             | Predator                  | R,W       |
| X128 | Hoverfly                         | <i>Diptera : Syrphidae : Unknown</i>                      | Pollinator + Pest Control | G,W       |
| X129 | Longhorn bee                     | <i>Hymenoptera : Apidae : Melissodes spp</i>              | Pollinator                | G,W       |
| X130 | Northern paper wasp              | <i>Hymenoptera : Vespidae : Polistes fuscatus</i>         | Predator                  | W         |
| X131 | Parasitic wasp                   | <i>Hymenoptera : Charipinae : Unknown</i>                 | Predator                  | All three |
| X132 | Green: long-legged fly           | <i>Diptera : Dolichopodidae : Amblysilopus spp</i>        | Predator                  | All three |
| X134 | Cricket                          | <i>Orthoptera : Gryllidae : Unknown</i>                   | Pest                      | R,W       |
| X135 | Orb weaver                       | <i>Araneae : Theridiidae : Parasteatoda</i>               | Predator                  | G,W       |
| X136 | Ground beetle                    | <i>Coleoptera : Unknown : Unknown</i>                     | Unknown                   | W         |
| X138 | Spider wasp                      | <i>Hymenoptera : Pompilidae : Unknown</i>                 | Predator                  | G,W       |
| X139 | Mayfly                           | <i>Ephemeroptera : Unknown : Unknown</i>                  | Unknown                   | W         |
| X141 | Springtail: Entomobryidae family | <i>Entomobryomorpha : Entomobryidae : Unknown</i>         | Pest + other benefit      | R,W       |
| X144 | Pigeon horntail                  | <i>Hymenoptera : Siricidae : Tremex columba</i>           | Predator                  | G         |
| X146 | Green lacewing fly               | <i>Neuroptera : Chrysopidae : Chrysoperla</i>             | Predator                  | G         |
| X148 | Hemiptera: Deraeocoris           | <i>Hemiptera : Miridae : Deraeocoris</i>                  | Predator                  | R,G       |
| X149 | Orange blister beetle            | <i>Coleoptera : Meloidae : Zonitis</i>                    | Pest                      | G         |
| X150 | Long-legged sac spider           | <i>Araneae : Cheriaceanthiidae : Cheriaceanthium spp</i>  | Predator                  | G,W       |
| X151 | Fulgoroidea (planthopper) nymph  | <i>Hemiptera : Fulgoroidea : Unknown</i>                  | Pest                      | W         |
| X153 | Cicada                           | <i>Hemiptera : Cicadoidea : Unknown</i>                   | Pest                      | W         |
| X154 | Barkfly                          | <i>Psocoptera : Ectopsocidae : Unknown</i>                | Other benefit             | R         |
| X156 | Fairy fly parasitic wasp         | <i>Hymenoptera : Mymaridae : Unknown</i>                  | Predator                  | R,G       |
| X157 | Ichneumon parasitic wasp         | <i>Hymenoptera : Ichneumonidae : Unknown</i>              | Predator                  | R,G       |

|      |                                  |                                                        |               |           |
|------|----------------------------------|--------------------------------------------------------|---------------|-----------|
| X158 | Rove beetle                      | <i>Coleoptera : Staphylinidae : Heterothops spp.</i>   | Predator      | All three |
| X159 | Nettle pollen beetle             | <i>Coleoptera : Kateretidae : Brachypterus urticae</i> | Pollinator    | R         |
| X160 | Emerald ash borer                | <i>Coleoptera : Buprestidae : Agrilus planipennis</i>  | Pest          | R         |
| X161 | Spotted wing drosophila          | <i>Diptera : Drosophilidae : Drosophila suzukii</i>    | Pest          | All three |
| X163 | Eulophidae parasitic wasp        | <i>Hymenoptera : Eulophidae : Unknown</i>              | Predator      | G         |
| X164 | Plant bug                        | <i>Hemiptera : Miridae : Neolygus</i>                  | Pest          | G,W       |
| X166 | Green leafhopper                 | <i>Hemiptera : Cicadellidae : Unknown</i>              | Pest          | G         |
| X167 | Diptera species                  | <i>Diptera : Pipunculidae : Unknown</i>                | Predator      | G         |
| X169 | Stem miner fly                   | <i>Diptera : Drosophilidae : scaptomyza spp</i>        | Pest          | G,W       |
| X170 | Whitefly                         | <i>Hemiptera : Aleyrodidae : Unknown</i>               | Pest          | W         |
| X171 | White parasitic wasp             | <i>Hymenoptera : Chalcidoidea : Unknown</i>            | Predator      | W         |
| X172 | Blister beetle                   | <i>Coleoptera : Meloidae : Unknown</i>                 | Pest          | G,W       |
| X173 | Brachymeria spp. parasitoid wasp | <i>Hymenoptera : Chalcidoidea : Brachymeria spp</i>    | Predator      | G         |
| X174 | Bark lice                        | <i>Psocodea : lepidopsocidae : echmepteryx spp</i>     | Other benefit | G,W       |
| X176 | Bee fly                          | <i>Diptera : Bombyliidae : Unknown</i>                 | Pollinator    | G         |
| X177 | Flying ant                       | <i>Hymenoptera : Formicidae : Unknown</i>              | Predator      | W         |

Table S2: Understory (non-crop) plant species found within grain (corn or soybean), willow, or riparian edge habitat from 2018-2019. Table includes the unique ID for each species, growth habit, classification (considered native/non-native), duration, and which crop/landcover they were associated with (G: grain; W: willow; R: riparian edge) across 2018 and 2019 sampling years.

| ID  | Common name           | Scientific name                         | Growth habit | Classification | Duration  | Crop association |
|-----|-----------------------|-----------------------------------------|--------------|----------------|-----------|------------------|
| X1  | Henbit                | <i>Lamium amplexicaule</i>              | Forb         | Introduced     | Annual    | All three        |
| X2  | Golden alexanders     | <i>Zizia aurea</i>                      | Forb         | Native         | Perennial | All three        |
| X3  | Yellow nutsedge       | <i>Cyperus esculentus</i>               | Graminoid    | Native         | Perennial | All three        |
| X4  | Gray's sedge          | <i>Carex grayi</i>                      | Graminoid    | Native         | Perennial | R                |
| X5  | Bedstraw              | <i>Galium spp.</i>                      | Forb         | Unknown        | Unknown   | R,W              |
| X6  | Bluevine              | <i>Ampelamus albidus</i>                | Vine         | Native         | Perennial | All three        |
| X8  | Perennial ryegrass    | <i>Lolium perenne</i>                   | Graminoid    | Introduced     | Perennial | R,W              |
| X9  | Common blue violet    | <i>Viola sororia</i>                    | Forb         | Native         | Perennial | R,W              |
| X10 | Virginia wild rye     | <i>Elymus virginicus</i>                | Graminoid    | Native         | Perennial | R,W              |
| X11 | Spring beauty         | <i>Claytonia virginica</i>              | Forb         | Native         | Perennial | R,W              |
| X12 | Red-seeded dandelion  | <i>Taraxacum erythrospermum</i>         | Forb         | Introduced     | Perennial | All three        |
| X13 | Common fox sedge      | <i>Carex stipata</i>                    | Graminoid    | Native         | Perennial | R                |
| X16 | Orchard grass         | <i>Dactylis glomerata</i>               | Graminoid    | Introduced     | Perennial | All three        |
| X17 | Ribwort plantain      | <i>Plantago lanceolata</i>              | Forb         | Introduced     | Perennial | R,W              |
| X18 | Clover spp.           | <i>Trifolium spp</i>                    | Forb         | Introduced     | Perennial | W                |
| X19 | Dock spp.             | <i>Rumex spp.</i>                       | Forb         | Unknown        | Perennial | R,W              |
| X20 | Avens spp.            | <i>Geum spp</i>                         | Forb         | Native         | Perennial | R                |
| X21 | Grass species         | <i>Leersia spp.</i>                     | Graminoid    | Native         | Perennial | R,W              |
| X22 | Daisy fleabane        | <i>Erigeron strigosus</i>               | Forb         | Native         | Biennial  | R,W              |
| X23 | Chickweed             | <i>Stellaria media</i>                  | Forb         | Introduced     | Annual    | R,W              |
| X24 | Speedwell             | <i>Veronica arvensis</i>                | Forb         | Introduced     | Annual    | W                |
| X25 | Poison hemlock        | <i>Conium maculatum</i>                 | Forb         | Native         | Biennial  | R,W              |
| X26 | Boxelder              | <i>Acer negundo</i>                     | Tree         | Native         | Perennial | R                |
| X27 | Lamb's quarters       | <i>Chenopodium album</i>                | Forb         | Introduced     | Annual    | All three        |
| X28 | Oxalis spp.           | <i>Oxalis spp.</i>                      | Forb         | Native         | Perennial | W                |
| X29 | Obedient plant        | <i>Physostegia virginiana</i>           | Forb         | Native         | Perennial | R                |
| X30 | Swamp buttercup       | <i>Ranunculus septentrionalis</i>       | Forb         | Native         | Perennial | R                |
| X31 | Snakeroot             | <i>Sanicula spp.</i>                    | Forb         | Native         | Unknown   | R                |
| X32 | Common cocklebur      | <i>Xanthium strumarium</i>              | Forb         | Native         | Annual    | R,G              |
| X33 | Jerusalem artichoke   | <i>Helianthus tuberosus</i>             | Forb         | Native         | Perennial | R,W              |
| X34 | Green ash             | <i>Fraxinus lanceolata</i>              | Tree         | Native         | Perennial | R,W              |
| X35 | Giant ragweed         | <i>Ambrosia trifida</i>                 | Forb         | Native         | Annual    | All three        |
| X36 | Mulberry              | <i>Morus spp.</i>                       | Tree         | Native         | Perennial | All three        |
| X37 | Morning glory         | <i>Convolvulaceae family: species 1</i> | Vine         | Unknown        | Annual    | All three        |
| X39 | Bush honeysuckle spp. | <i>Lonicera spp.</i>                    | Shrub        | Introduced     | Perennial | R,W              |
| X40 | Yellow foxtail        | <i>Setaria glauca</i>                   | Graminoid    | Introduced     | Annual    | G,W              |
| X41 | Marestail/Horseweed   | <i>Conyza canadensis</i>                | Forb         | Native         | Annual    | G                |
| X42 | Rugel's plantain      | <i>Plantago rugelii</i>                 | Forb         | Native         | Perennial | W                |
| X43 | Black nightshade      | <i>Solanum ptycanthum</i>               | Forb         | Native         | Annual    | R,W              |
| X44 | Poison ivy            | <i>Toxicodendron radicans</i>           | Vine         | Native         | Perennial | W                |
| X45 | Tall goldenrod        | <i>Solidago altissima</i>               | Forb         | Native         | Perennial | R,W              |
| X46 | Panicled aster        | <i>Symphyotrichum lanceolatum</i>       | Forb         | Native         | Perennial | All three        |
| X47 | Giant goldenrod       | <i>Solidago gigantea</i>                | Forb         | Native         | Perennial | R,W              |
| X48 | Pigweed               | <i>Amaranthus spp.</i>                  | Forb         | Introduced     | Annual    | R,G              |

|     |                     |                                    |           |            |           |           |
|-----|---------------------|------------------------------------|-----------|------------|-----------|-----------|
| X49 | Fall panicum        | <i>Panicum dichotomiflorum</i>     | Forb      | Native     | Annual    | G         |
| X50 | Honey locust        | <i>Gleditsia triacanthos</i>       | Tree      | Native     | Perennial | R,W       |
| X51 | Climbing buckwheat  | <i>Fallopia scandens</i>           | Vine      | Native     | Perennial | R         |
| X52 | Cherry spp.         | <i>Prunus spp.</i>                 | Tree      | Native     | Perennial | R,W       |
| X53 | Crabgrass           | <i>Digitaria spp.</i>              | Graminoid | Introduced | Annual    | W         |
| X56 | Tall fescue         | <i>Festuca arundinacea</i>         | Graminoid | Introduced | Perennial | W         |
| X59 | Alumroot spp.       | <i>Heuchera spp.</i>               | Forb      | Native     | Perennial | W         |
| X61 | Mugwort             | <i>Artemisia vulgaris</i>          | Forb      | Introduced | Perennial | R,W       |
| X62 | Unknown seedling #2 | Unknown                            | Forb      | Unknown    | Unknown   | R,W       |
| X63 | Onion spp.          | <i>Allium spp.</i>                 | Forb      | Native     | Perennial | R         |
| X64 | Carrot spp. #1      | <i>Apiaceae family: unknown</i>    | Forb      | Unknown    | Unknown   | R,W       |
| X65 | Sweet cicely        | <i>Osmorhiza spp</i>               | Forb      | Native     | Perennial | R,W       |
| X66 | Shepherd's purse    | <i>Capsella bursa-pastoris</i>     | Forb      | Introduced | Annual    | G,W       |
| X67 | Stinging nettle     | <i>Urtica dioica</i>               | Forb      | Native     | Perennial | R,W       |
| X71 | Elm spp.            | <i>Ulmus spp.</i>                  | Tree      | Unknown    | Perennial | All three |
| X72 | Maple               | <i>Acer spp.</i>                   | Tree      | Native     | Perennial | All three |
| X73 | Virginia creeper    | <i>Parthenocissus quinquefolia</i> | Vine      | Native     | Perennial | W         |
| X75 | Jewelweed           | <i>Impatiens capensis</i>          | Forb      | Native     | Annual    | W         |
| X77 | Honewort            | <i>Cryptotaenia canadensis</i>     | Forb      | Native     | Perennial | R         |
| X78 | Reed canary grass   | <i>Phalaris arundinacea</i>        | Graminoid | Native     | Perennial | R,W       |
| X79 | Mustard spp. #2     | <i>Brassica spp. 2</i>             | Forb      | Unknown    | Annual    | R         |
| X80 | Black medick        | <i>Medicago lupulina</i>           | Forb      | Introduced | Perennial | W         |
| X81 | Yellow sweet clover | <i>Melilotus officinalis</i>       | Forb      | Introduced | Biennial  | W         |
| X83 | Purslane            | <i>Portulaca oleracea</i>          | Forb      | Native     | Annual    | G         |
| X84 | Spotted spurge      | <i>Euphorbia maculata</i>          | Forb      | Native     | Annual    | G         |
| X85 | Grape               | <i>Vitis spp.</i>                  | Vine      | Native     | Perennial | W         |
| X87 | Beggarticks         | <i>Bidens spp.</i>                 | Forb      | Native     | Annual    | W         |
| X89 | Velvetleaf          | <i>Abutilon theophrasti</i>        | Forb      | Introduced | Annual    | G         |
| X90 | Mustard spp.        | <i>Brassicaceae spp.</i>           | Forb      | Unknown    | Annual    | G         |
| X91 | Pine                | <i>Pinus spp.</i>                  | Tree      | Native     | Perennial | W         |
| X92 | Indian grass        | <i>Sorghastrum nutans</i>          | Graminoid | Native     | Perennial | G         |
| X93 | Red oak             | <i>Quercus rubra</i>               | Tree      | Native     | Perennial | W         |
| X94 | Creeping Charlie    | <i>Glechoma hederacea</i>          | Vine      | Introduced | Perennial | R         |
